# Supplementary material for: SIRT3 and Metabolic Reprogramming Mediate the Antiproliferative Effects of Whey in Human Colon Cancer Cells
Source: Cancers (Basel). 2021 Oct 16;13(20):5196. doi: 10.3390/cancers13205196 (PMC8533739; doi:10.3390/cancers13205196)
Supplement: Supplementary file 1 [file cancers-13-05196-s001.zip › cancers-1426474-SI.pdf]

# SIRT3 and metabolic reprogramming mediate the antiproliferative effects of whey in human colon cancer cells

## SUPPLEMENTARY MATERIALS

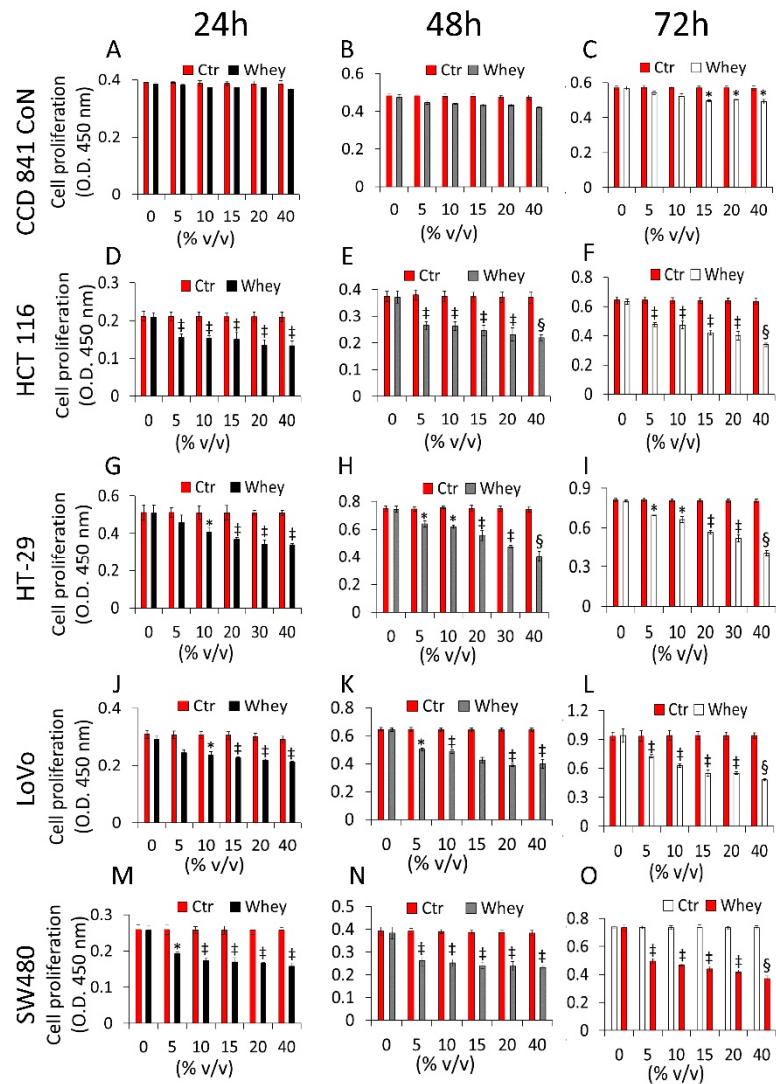

**Figure S1.** Whey effects on colorectal cell proliferation. Cell proliferation assays after exposure to different volumes (0, 5, 10, 15, 20 and 40 % v/v) of HBSS-10 mM Hepes (Ctr) or whey for different times (24, 48 and 72 h), were performed in (A-C) CCD 841 CoN, (D-F) HCT 116, (G-I) HT-29, (J-L) LoVo and (M-O) SW480 cell lines and expressed as optical density (O.D.) values. Cell proliferation was assessed using Cell Counting Kit-8 assay (Donjindo Molecular Technologies, Tokyo, Japan). Values represent the mean±SD of three independent experiments. \*p<0.05 vs. Ctr; ‡p<0.01 vs. Ctr; §p<0.001 vs. Ctr.

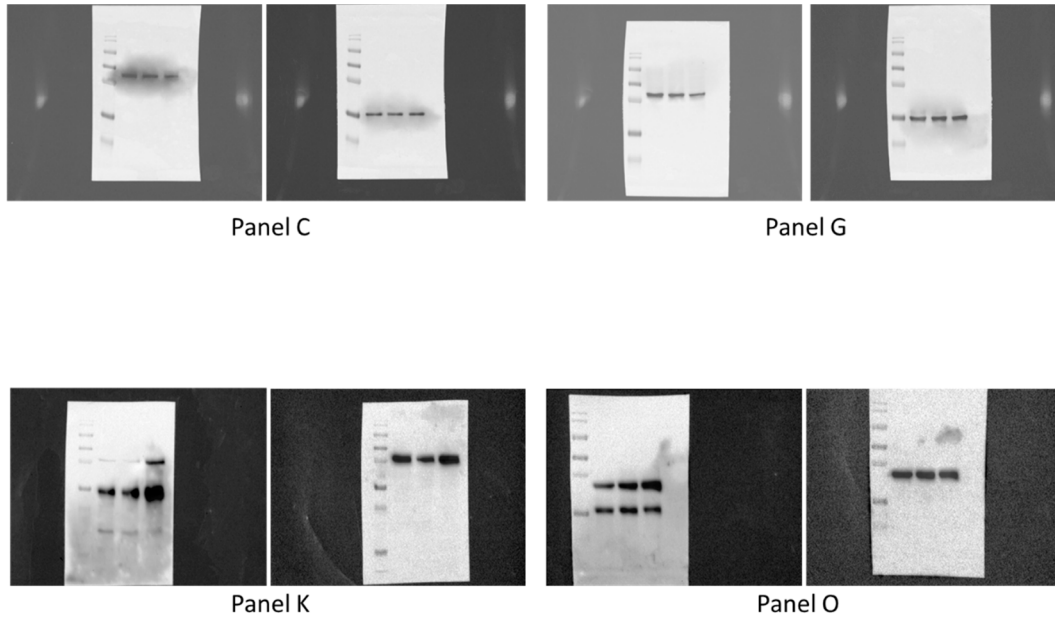

**Figure S2.** Image representing untouched, uncropped gels related to Figure 2.

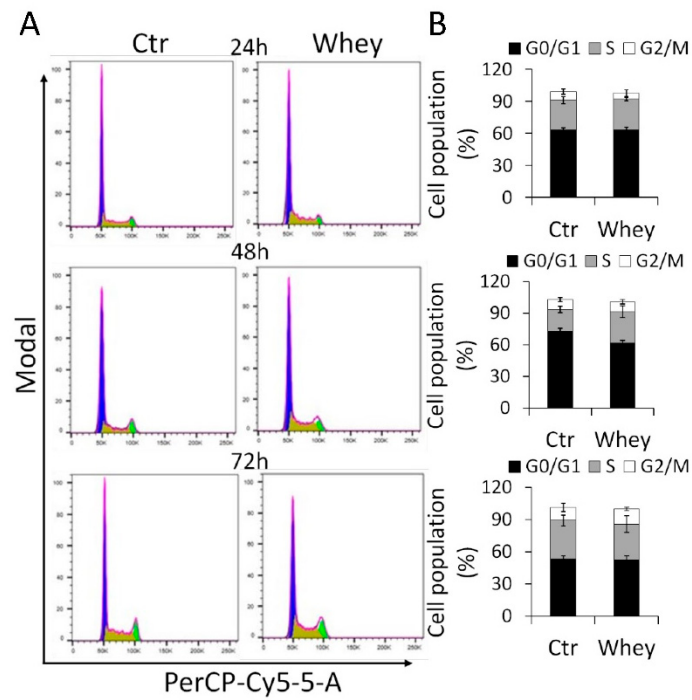

**Figure S3.** Whey treatment does not modulate the CCD 841 CoN colon cell cycle. (A-B) Representative dot plots and cell cycle analysis of CCD 841 CoN non-tumoral colon cell line. CCD 841 CoN cells were treated with 40 % v/v HBSS-10 mM Hepes (Ctr) or whey 40 % v/v for 24, 48 and 72 h and cell distribution assessed by flow cytometry collecting PI fluorescence as FL3-A (linear scale). For each sample at least 10,000 events were collected and analysis performed by using ModFIT software.

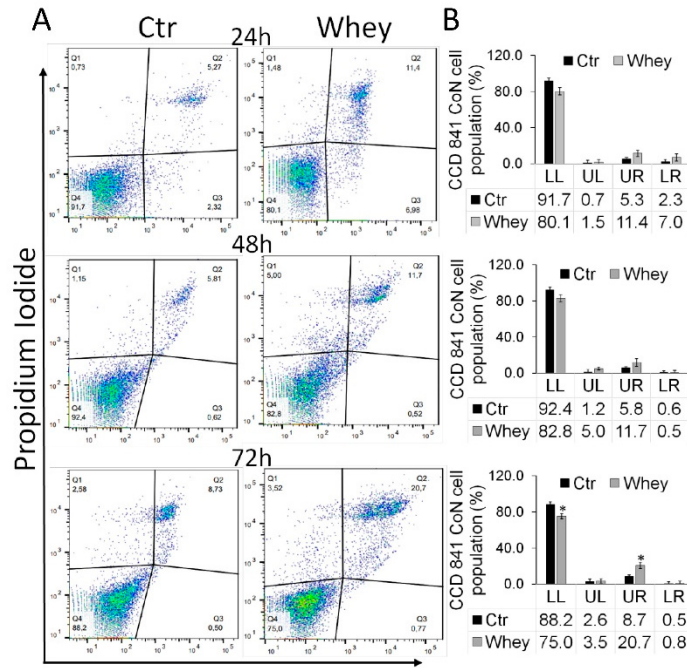

**Figure S4.** Whey does not display apoptotic effects in CCD 841 CoN cells. (A-B) Representative dot plots and analysis of annexin V-FITC and PI-stained CCD 841 CoN normal colon cells. Cells were treated with 40 % v/v HBSS-10 mM Hepes (Ctr) or whey 40 % v/v for 24, 48 and 72 h and cell viability/death assessed by flow cytometry. Lower left (LL), viable cells; upper left (UL), necrotic cells; lower right (LR), early apoptotic cells; upper right (UR), late apoptotic cells. Data are expressed as mean $\pm$ SD of n = 3 experiments. At least 10,000 events were acquired. \*p<0.05 vs. Ctr.

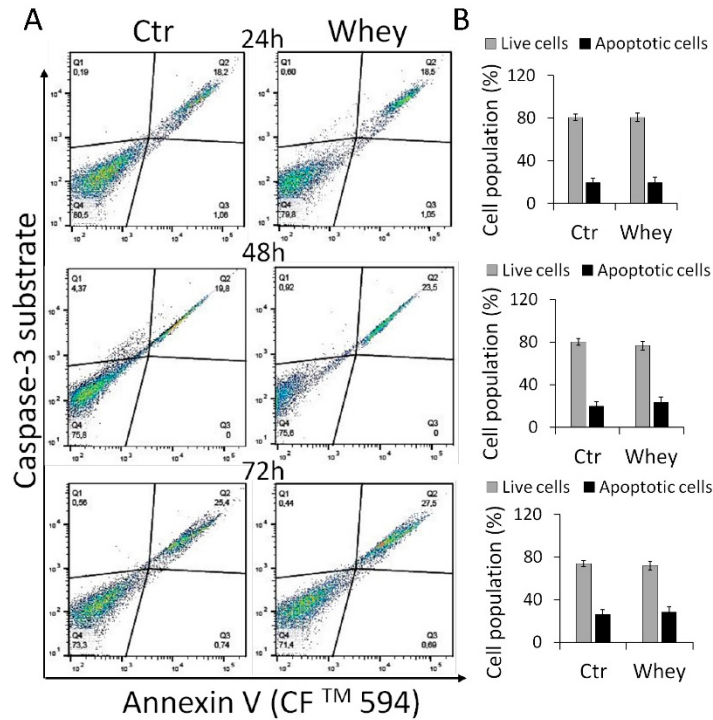

**Figure S5.** Whey does not mediate caspase-3 activation in non-tumoral colon cells. (A-B) Representative dot plots and analysis of caspase-3 activation in CCD 841 CoN normal colon cells. Cells were treated with 40 % v/v HBSS-10 mM Hepes (Ctr) or whey 40 % v/v for 24, 48 and 72 h and cell population assessed by flow cytometry. Data are expressed as % of live or apoptotic population with mean $\pm$ SD of n = 3 experiments. At least 10,000 events were acquired.

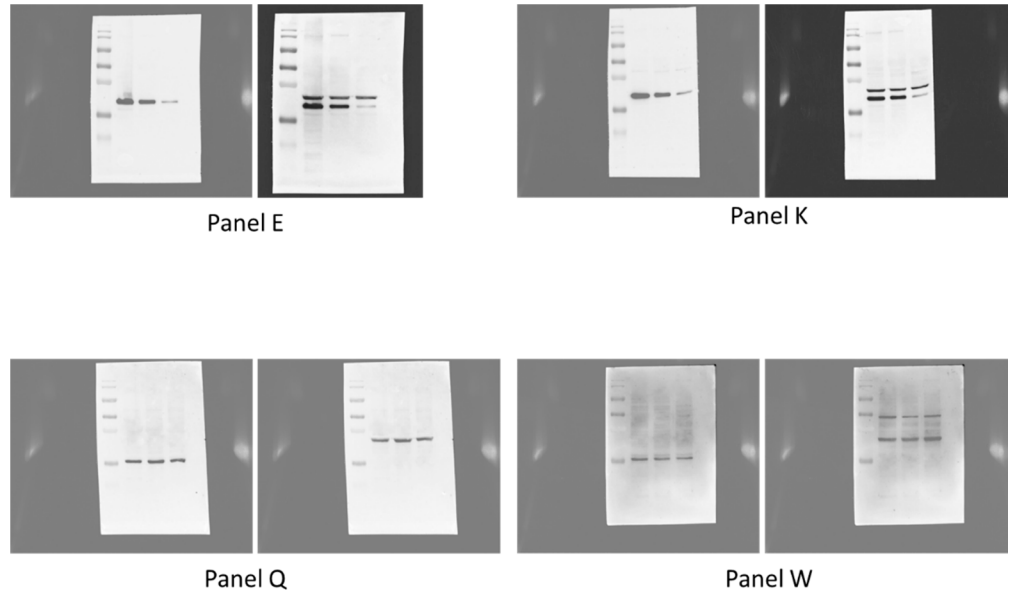

**Figure S6.** Image reporting untouched, uncropped gels related to Figure 5.

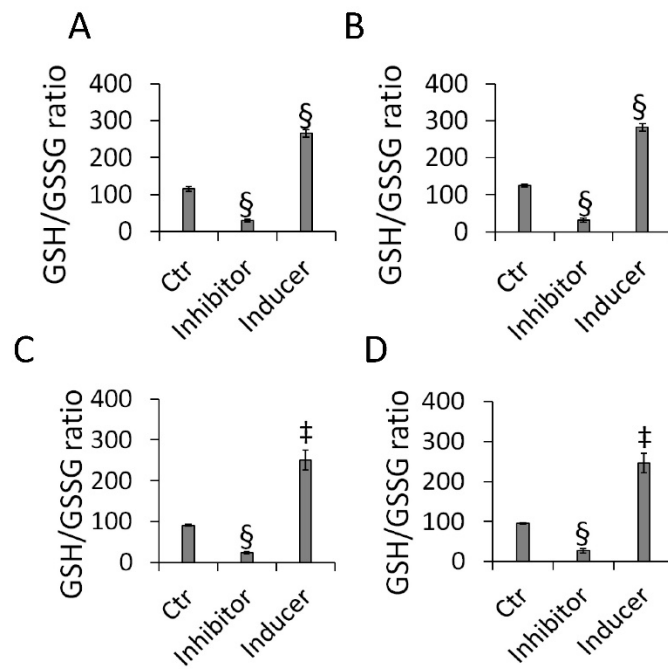

**Figure S7.** Redox state controls. GSH/GSSG ratios detected on (A) HCT 116, (B) HT-29, (C) SW480 and (D) LoVo cells. Cell lines were treated with 40 % v/v HBSS-10 mM Hepes (Ctr) or 20  $\mu$ M ethacrynic acid (Glutathione S-transferase inhibitor) or dihydromyristicin (Glutathione S-transferase inducer) for 2 h and redox state assessed by GSSG/GSH quantification kit (G257, Dojindo Molecular Technologies, Tokyo, Japan).  $\dagger p < 0.01$  vs. Ctr;  $\S p < 0.001$  vs. Ctr.

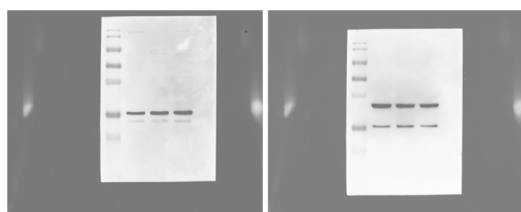

Panel A

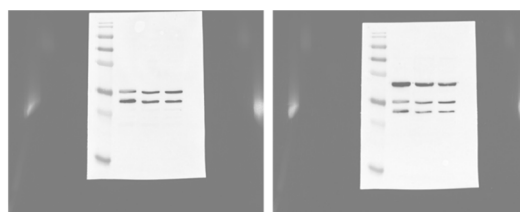

Panel E

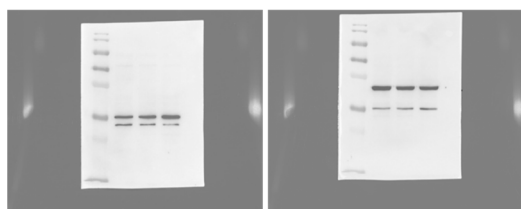

Panel I

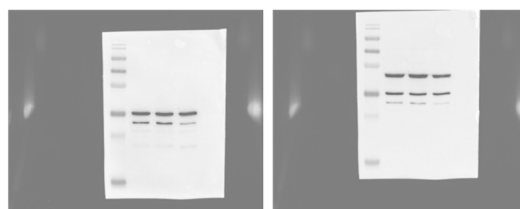

Panel M

**Figure S8.** Image reporting untouched, uncropped gels related to Figure 6.

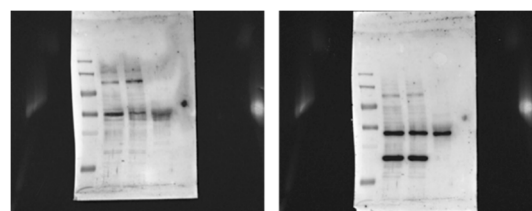

Panel A

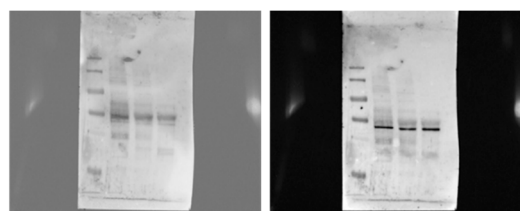

Panel C

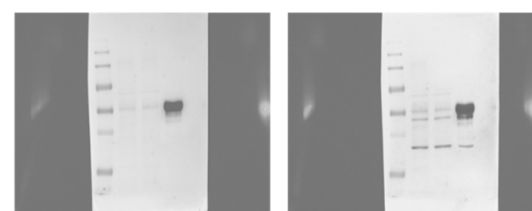

Panel E

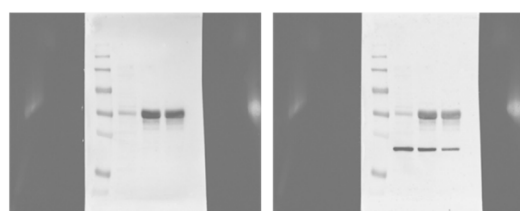

Panel G

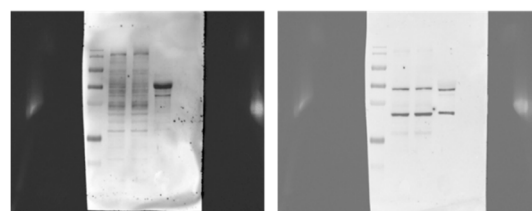

Panel I

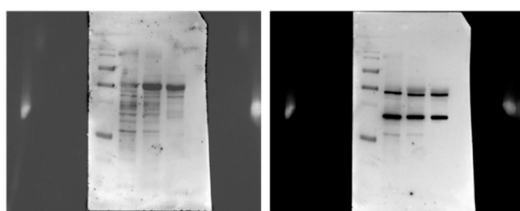

Panel K

**Figure S9.** Image reporting untouched, uncropped gels related to Figure 7.

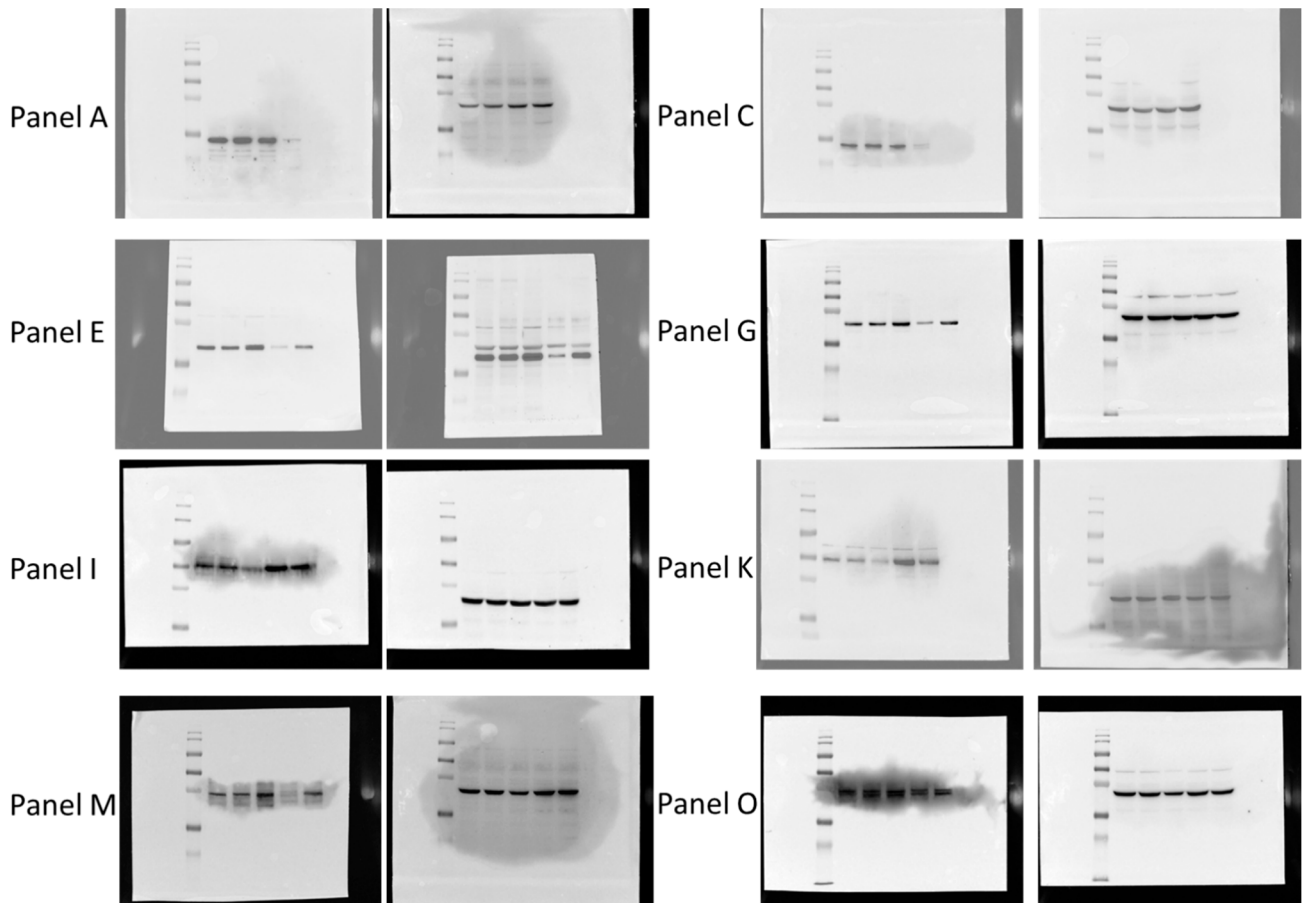

**Figure S10.** Image reporting untouched, uncropped gels related to Figure 8.

**Table S1.** Oligo sequences for SIRT3 silencing and negative control (NT-siRNA).

| <i>RNA</i>          | <i>Sequence</i>                            |
|---------------------|--------------------------------------------|
| SIRNA-SIRT3-OLIGO 1 | Sense: 5' – GGUGGAGGAUGGUCCAUAUTT – 3'     |
|                     | Antisense: 5' – AUAUGGACCAUCCUCCACCTT – 3' |
| SIRNA-SIRT3-OLIGO 2 | Sense: 5' – CCAGCGGCAUCCAGACUUTT – 3'      |
|                     | Antisense: 5' – AAGUCUGGGAUGCCGUGGTT – 3'  |
| SIRNA-SIRT3-OLIGO 3 | Sense: 5' – CCCUGACUAAAGCUCGUUTT – 3'      |
|                     | Antisense: 5' – AACGAGCUUUGAGUCAGGGTT – 3' |
| Negative Control    | Sense: 5' – UUCUCCGAACGUGUCACGUTT – 3'     |
|                     | Antisense: 5' – ACGUGACACGUUCGAGAATT – 3'  |
